# Supplementary material for: Dietary Protein Intake, Breast Feeding and Growth in Human Milk Fed Preterm Infants
Source: MDPI journal article supplement (doi:10.3390/ijerph15061196), 2018-06-07
Supplement: s1 [file s1]

## Supplementary Material

**Table S1** Clinical characteristics of participants by randomisation group

| Infants ( <i>n</i> = 92)            | Whole Cohort<br>( <i>n</i> =92) |                                    | <1000g<br>( <i>n</i> = 44)      |                                    | ≥1000g<br>( <i>n</i> = 48)      |                                    |
|-------------------------------------|---------------------------------|------------------------------------|---------------------------------|------------------------------------|---------------------------------|------------------------------------|
|                                     | Std<br>Protein<br><i>n</i> = 49 | Higher<br>Protein<br><i>n</i> = 43 | Std<br>Protein<br><i>n</i> = 20 | Higher<br>Protein<br><i>n</i> = 24 | Std<br>Protein<br><i>n</i> = 29 | Higher<br>Protein<br><i>n</i> = 19 |
| Gestational age (weeks)             | 28 (27,<br>29)                  | 27 (25,<br>29)                     | 26.5<br>(25.3, 28)              | 25.5<br>(24.3,<br>27.8)            | 28 (28,<br>29)                  | 29 (28,<br>30)                     |
| <b>Recruitment hospital</b>         |                                 |                                    |                                 |                                    |                                 |                                    |
| Women's and Children's<br>Hospital  | 43                              | 37                                 | 18                              | 20                                 | 25                              | 17                                 |
| Flinders Medical Centre             | 6                               | 6                                  | 2                               | 4                                  | 4                               | 2                                  |
| Male infants                        | 21                              | 19                                 | 5                               | 14                                 | 16                              | 5                                  |
| <b>Birth anthropometry</b>          |                                 |                                    |                                 |                                    |                                 |                                    |
| Weight (g)                          | 1056, 289                       | 1012, 315                          | 787, 146                        | 789, 165                           | 1242, 203                       | 1294, 219                          |
| Length (cm)†                        | 35.6,<br>3.4( <i>n</i> =<br>48) | 35.7,3.5                           | 32.4, 2.8<br>( <i>n</i> = 19)   | 33.4, 2.7                          | 37.7, 1.9                       | 38.6, 1.7                          |
| Head circumference (cm)             | 25.6, 2                         | 25.3, 2.5                          | 23.8, 1.4                       | 23.8, 2.1<br>( <i>n</i> = 23)      | 26.8, 1.4                       | 27, 1.6                            |
| Caesarean section                   | 32                              | 27                                 | 16                              | 15                                 | 16                              | 12                                 |
| Multiple births (number of infants) | 20                              | 4                                  | 7                               | 3                                  | 13                              | 1                                  |
| <b>Mothers (<i>n</i> = 80)</b>      |                                 |                                    |                                 |                                    |                                 |                                    |
| Age (years)                         | <i>n</i> = 39<br>30, 5          | <i>n</i> = 41<br>29, 6             | <i>n</i> = 16<br>31, 6          | <i>n</i> = 23<br>31, 6             | <i>n</i> = 23<br>30, 5          | <i>n</i> = 18<br>28, 5             |
| Smoked during pregnancy             | 6                               | 9                                  | 3                               | 5                                  | 3                               | 4                                  |
| Previous preterm birth              | 5                               | 6                                  | 0                               | 1                                  | 5                               | 5                                  |
| Received antenatal steroids         | 45                              | 36 ( <i>n</i> =<br>42)             | 15                              | 20                                 | 21                              | 15                                 |
| Received IVF                        | 8                               | 3                                  | 2                               | 2                                  | 6                               | 1                                  |
| Completed Secondary Education §     | 26                              | 31                                 | 11                              | 19                                 | 15                              | 12                                 |

Data are presented as median (interquartile range), *N*, Mean, SD.

Abbreviations: IVF, *in vitro* fertilisation

† *n* = 91 infants

‡ Mothers of twins were categorised according to the BW of the first born, if weight categories of the 2 infants differed

§ *n* = 79 mothers

**Table S2** Infant outcomes by randomisation group

| Clinical Outcomes                                                                | Whole cohort<br>(n = 92) |                   | <1000g<br>(n = 44) |                  | ≥1000g<br>(n = 48) |                   |
|----------------------------------------------------------------------------------|--------------------------|-------------------|--------------------|------------------|--------------------|-------------------|
|                                                                                  | Std                      | Higher            | Std                | Higher           | Std                | Higher            |
|                                                                                  | Protein<br>n = 49        | Protein<br>n = 43 | Protein<br>n= 20   | Protein<br>n= 24 | Protein<br>n = 29  | Protein<br>n = 19 |
| <b>Chronic lung disease †</b>                                                    | 17                       | 20                | 12                 | 17               | 5                  | 3                 |
| <b>Received corticosteroid treatment</b>                                         | 17                       | 14                | 11                 | 12               | 6                  | 2                 |
| <b>Confirmed necrotizing enterocolitis</b>                                       | 5                        | 3                 | 4                  | 3                | 1                  | 0                 |
| <b>Intraventricular haemorrhage ‡</b>                                            | 13                       | 10                | 4                  | 6                | 9                  | 4                 |
| <b>Sepsis</b>                                                                    | 7                        | 6                 | 4                  | 4                | 3                  | 2                 |
| <b>Nasal CPAP</b>                                                                | 14                       | 12                | 3                  | 6                | 11                 | 6                 |
| <b>Length of stay §</b>                                                          | 74, 16                   | 77, 21            | 84, 12             | 90, 15           | 66, 15             | 61, 16            |
| <b>Post-menstrual age at discharge or<br/>EDD (weeks)</b>                        | 38 (37,<br>40)           | 38 (37,<br>39)    | 39 (38,<br>40)     | 39 (38,<br>40)   | 38 (37,<br>39)     | 37 (36,<br>38)    |
| <b>Growth outcomes</b>                                                           |                          |                   |                    |                  |                    |                   |
| <b>Weight gain ¶ (g/day)</b>                                                     | 28.6, 5.7                | 29.1, 4.7         | 26.4, 5            | 27.4, 4.3        | 30.1, 5.7          | 31.3, 4.4         |
| <b>Intrauterine weight gain<br/>(g/kg/day)(26)</b>                               |                          |                   |                    |                  |                    |                   |
| <b>Weight gain ¶ (g/kg/day)</b>                                                  | 16.3, 1.9                | 16.6, 2           | 17, 1.6            | 16.8, 1.8        | 15.8, 1.9          | 16.3, 2.3         |
| <b>Weight gain before 34 weeks PMA<br/>(g/day)</b>                               | 25.5, 6                  | 24.6, 6.4         | 22.7, 5.4          | 22, 5.9          | 27.5, 5.6          | 28, 5.5           |
| <b>Weight gain after 34 weeks PMA<br/>(g/day)</b>                                | 29.3, 6.9                | 31.3, 6           | 29, 5.9            | 29.09, 5         | 29.5, 7.6          | 33.1, 6.7         |
| <b>Length gain (cm/week)</b>                                                     | 1.1, 0.2                 | 1.2, 0.1          | 1.1, 0.1           | 1.2, 0.1         | 1.1, 0.2           | 1.2, 0.2          |
| <b>Head circumference gain (cm/week)</b>                                         | 1, 0.2                   | 1, 0.1            | 1, 0.1             | 1, 0.1           | 1, 0.2             | 1, 0.2            |
| <b>Discharge weight (grams)</b>                                                  | 2647, 374                | 2753, 331         | 2565, 492          | 2742, 358        | 2703, 260          | 2768, 302         |
| <b>Dietary Outcomes</b>                                                          |                          |                   |                    |                  |                    |                   |
| <b>Age study fortifier commenced<br/>(days)</b>                                  | 13 (10,<br>16)           | 13 (10,<br>18)    | 14 (12,<br>18)     | 18 (11,<br>22)   | 11 (8, 16)         | 10 (8, 13)        |
| <b>Age enteral feeds commenced (days)</b>                                        | 3 (2, 5)                 | 3 (2, 4)          | 4 (3, 5)           | 4 3, 5           | 3 (2, 5)           | 3 (2, 4)          |
| <b>Days to reach full enteral feeds<br/>(days)</b>                               | 15 (12,<br>18)           | 17 (11,<br>23)    | 16 (14,<br>24)     | 21 (16,<br>27)   | 13 (11,<br>17)     | 12 (8, 14)        |
| <b>HMF introduced (ml/kg enteral<br/>intake)</b>                                 | 120 (93,<br>141)         | 120 (96,<br>156)  | 99 (90,<br>132)    | 111 (74,<br>151) | 137 (105,<br>149)  | 131 (108,<br>157) |
| <b>Days on parenteral nutrition (days)</b>                                       | 16 (12,<br>29)           | 17 (10,<br>25)    | 24 (15,<br>31)     | 32 (16,<br>27)   | 14 (9, 17)         | 11 (7, 15)        |
| <b>Days on intravenous lipid (days)</b>                                          | 12 (8, 19)               | 11 (7, 16)        | 15 (10,<br>23)     | 16 (10,<br>23)   | 10 (6, 14)         | 7 (4, 10)         |
| <b>Human milk as a proportion of measured enteral intake (number of infants)</b> |                          |                   |                    |                  |                    |                   |
| <b>&gt;80%</b>                                                                   | 23                       | 26                | 8                  | 14               | 15                 | 12                |
| <b>20% to 80%</b>                                                                | 23                       | 11                | 10                 | 6                | 13                 | 5                 |
| <b>&lt;20%</b>                                                                   | 3                        | 6                 | 2                  | 4                | 1                  | 2                 |

Data are presented as N, Mean, SD and median (interquartile range).

Abbreviations: CPAP, continuous positive airway pressure; EDD, estimated due date; HMF, human milk fortifier

† As defined by requirement for supplemental oxygen at 36 weeks post-menstrual age; ‡ n = 91 infants; §To discharge home or estimated due date, whichever came first.; ¶ **Weight gain from when birth weight regained and maintained 2 days**
